# Supplementary material for: The Rise in Tubular pH during Hypercalciuria Exacerbates Calcium Stone Formation
Source: MDPI journal article supplement (doi:10.3390/ijms25094787), 2024-04-27
Supplement: s1 [file s1]

## SUPPLEMENTAL MATERIALS

### The rise in tubular pH during hypercalciuria exacerbates calcium stone formation

Farai Gombedza <sup>1</sup>, Samuel Shin <sup>1,2</sup>, Jaclyn Sadiua <sup>1</sup>, George B. Stackhouse <sup>3</sup> and Bidhan C. Bandyopadhyay <sup>1,2,4\*</sup>

<sup>1</sup> Calcium Signaling Laboratory, Research Service, Veterans Affairs Medical Center, 50 Irving Street, NW, Washington, DC 20422, USA

<sup>2</sup> Department of Biomedical Engineering, The Catholic University of America, 620 Michigan Avenue NE, Washington DC, 20064, USA.

<sup>3</sup> Urology Service, Veterans Affairs Medical Center, 50 Irving Street, NW, Washington, DC 20422, USA

<sup>4</sup> Division of Renal Diseases & Hypertension, Department of Medicine, The George Washington University, Washington DC, 20037, USA

**Running title:** Rise in tubular  $\text{Ca}^{2+}$  and pH induces Calcium Nephrolithiasis

**Keywords:** hypercalciuria; renal tubular pH; proximal tubule; oxidative stress; inflammation; fibrosis; apoptosis; calcium nephrolithiasis

**\*Corresponding author:** Bidhan C. Bandyopadhyay, PhD. Chief, Calcium Signaling Laboratory, 151 Research Service, Veterans Affairs Medical Center, 50 Irving Street, NW, Washington, DC 20422, Phone: (202) 745-8622, Fax: (202) 462-2006; E-mail: [bidhan.bandyopadhyay@va.gov](mailto:bidhan.bandyopadhyay@va.gov)

### Supplemental Figure

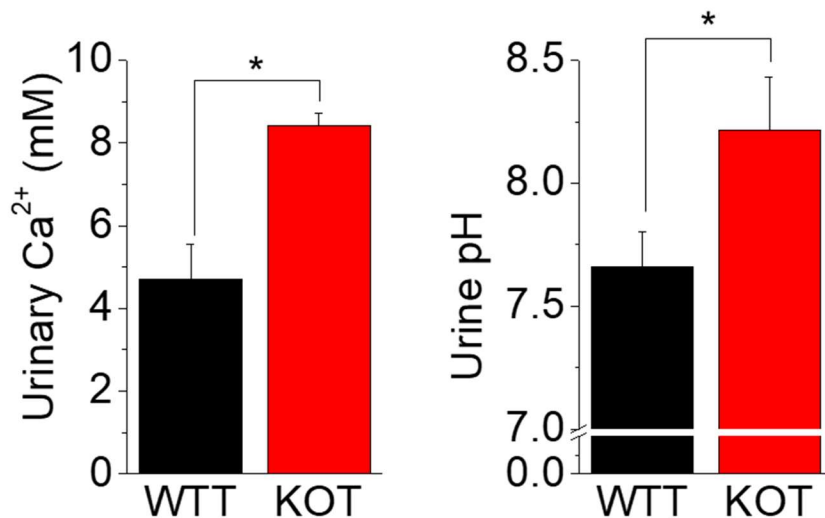

**Figure S1.** Urinary  $\text{Ca}^{2+}$  and pH measurements of mice following 2% calcium gluconate plus 0.08% acetazolamide treatments. Bar diagrams show significant changes between the treated group (WTT and KOT). Representative bar graphs are plotted from means  $\pm$ SEM of 4 separate experiments. \*,  $p < 0.05$ .
